# Supplementary material for: Rapid determination of technetium-99 by automatic solid phase extraction and inductively coupled plasma mass spectrometry
Source: Royal Society of Chemistry journal article supplement (doi:10.1039/c4ra06591c), 2014-01-01
Supplement: c4ra06591c1.pdf [file c4ra06591c1.pdf]

## Supplementary data

Table S1. Operating conditions for ICP-MS instrument

|                             |       |
|-----------------------------|-------|
| Radiofrequency power (W)    | 1240  |
| Sampling depth (mm)         | 14.8  |
| Nebulizer flow rate (L/min) | 0.88  |
| Auxillary flow rate (L/min) | 0.93  |
| Einzel lens No 2 (V)        | -72   |
| Pole Bias lens (V)          | -3.10 |
| Extraction lens (V)         | -514  |
| Quadrupole focus (V)        | 14.3  |

Table S2. Operational parameters of ICP-AES

|                                 |          |
|---------------------------------|----------|
| Plasma condition                |          |
| RF power                        | 1.1Kw    |
| Plasma gas flow rate (L/min)    | 12       |
| Auxillary gas flow rate (L/min) | 0        |
| Sheath gas flow rate (L/min)    | 0.25     |
| Sample uptake rate (ml/min)     | 1.7      |
| Wavelength/nm                   | Mo 202.0 |

Table S3. The summary of the detection methods used for <sup>99</sup>Tc analysis.

|                           | SPE+ICP-MS     | LSC           |
|---------------------------|----------------|---------------|
| Detection limitation      | 1-3 mBq/mL     | 500 mBq/mL    |
| Time of sample processing | 35 min         | 3 hrs         |
| Time of analysis          | 2 min/sample   | 20 min/sample |
| Scintillation fluid       | No             | Yes           |
| Working hours             | Less then 1 hr | 4 hrs         |
